# Supplementary material for: Circ‐myh8 Promotes Pulmonary Hypertension by Recruiting KAT7 to Govern Hypoxia‐Inducible Factor‐1α Expression
Source: PubMed Central journal article supplement — J Am Heart Assoc. 2023 Mar 21;12(7):e028299. doi: 10.1161/JAHA.122.028299 (PMC10122881; doi:10.1161/jaha.122.028299), 2023-03-21
Supplement: JAH3-12-e028299-s001.pdf [file JAH3-12-e028299-s001.pdf]

# **SUPPLEMENTAL MATERIAL**

**Figure S1. Identification and Validation of a Novel Circular RNA (circ-myh8) in mice PSMCs.**

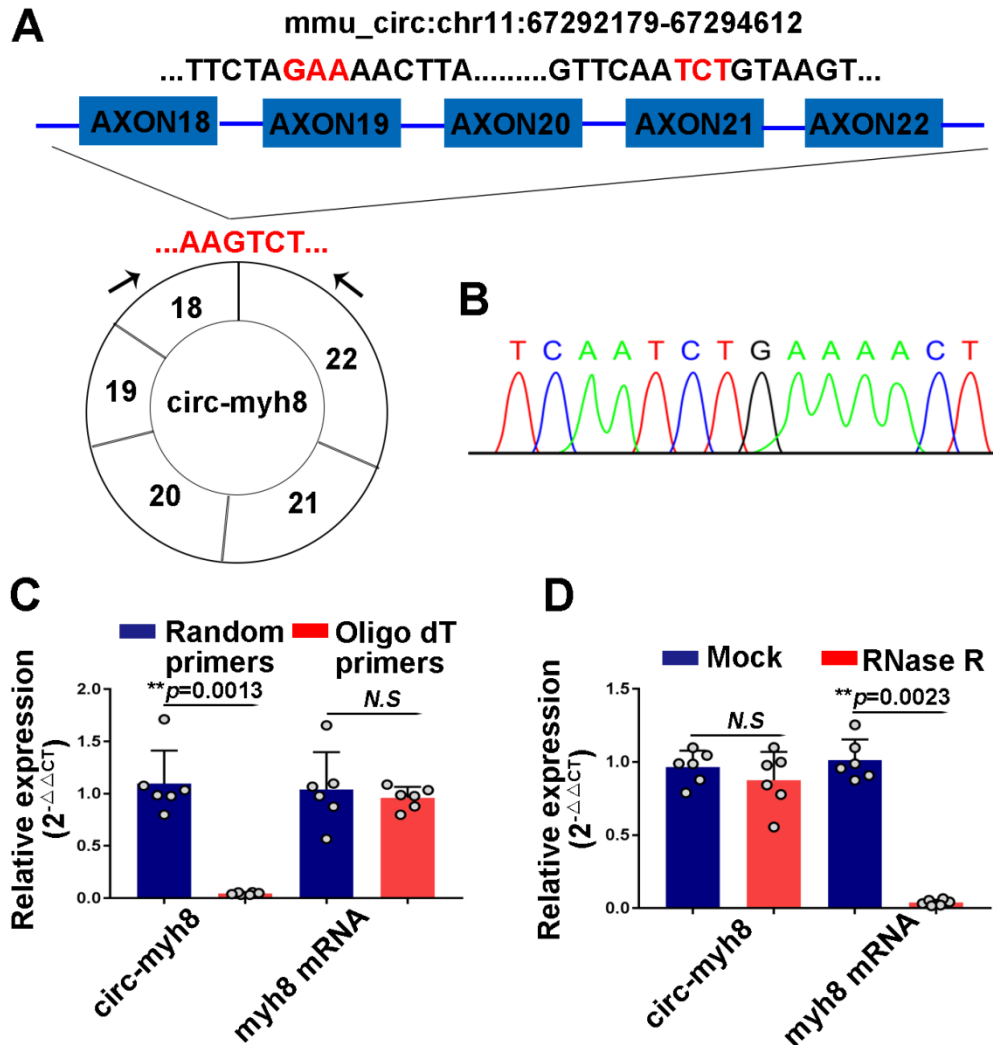

(a) Schematic diagram of circ-myh8. Exons 18, 19, 20, 21 and 22 of mice myh8 gene are linked end to end to form a circular structure. (b) The Sanger sequencing of the back-splice sites of the PCR products from the designed primers set#2. (c) RT-qPCR analysis for the circ-myh8 and myh8 mRNA using the template cDNA reverse-transcribed by random primers and oligo dT primers. (d) RT-qPCR assay for the expression of circ- myh8 and myh8 mRNA in PSMCs treated with RNase R. \*\*p<0.01.

**Figure S2. Circ-myh8 expression in tissues from hypoxic PH mice.**

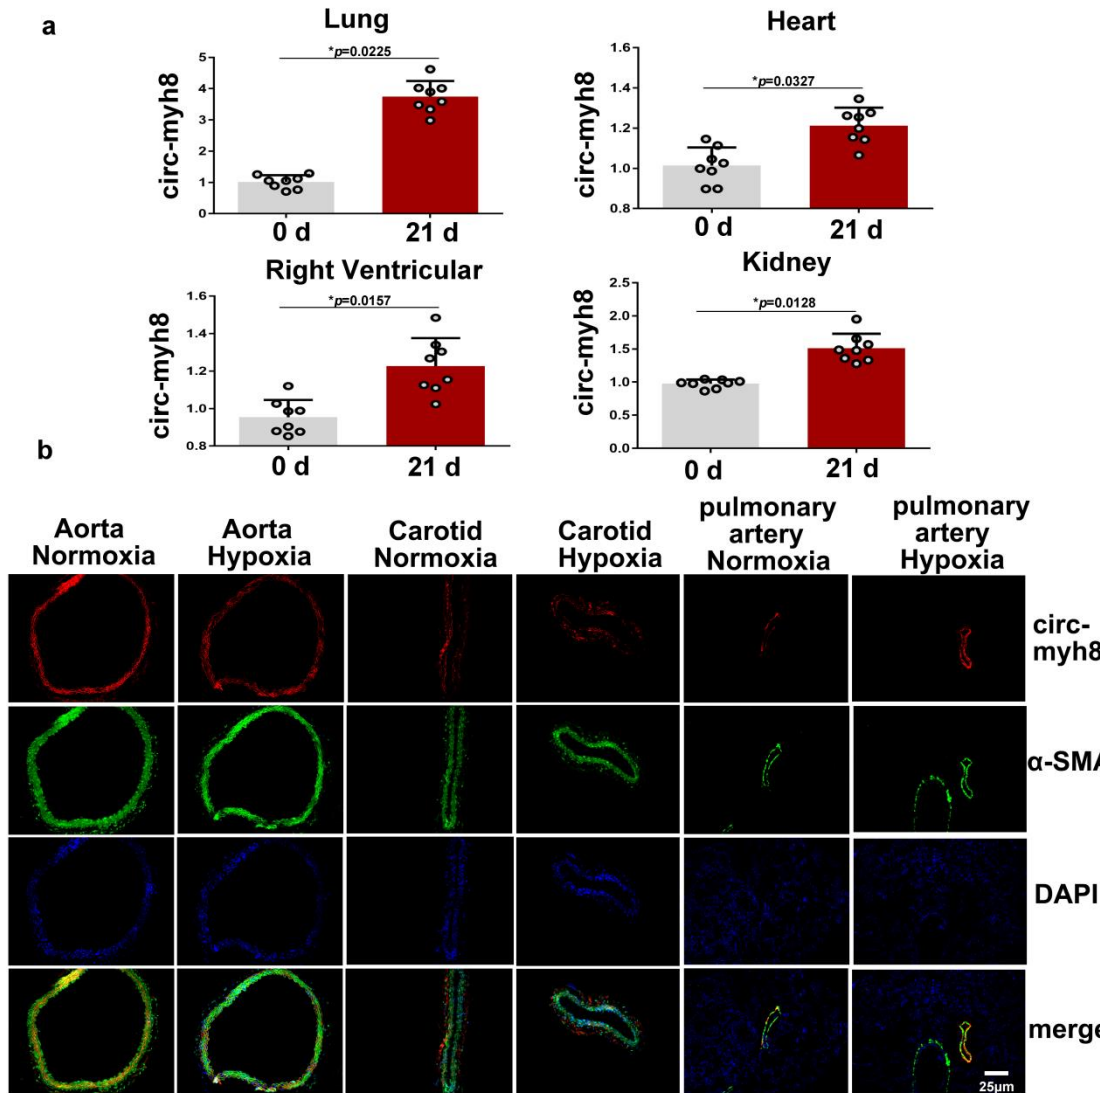

**(a)** RT-qPCR assay for circ-myh8 expression in different mice tissues. **(b)** Fluorescent in situ hybridization (FISH) for circ-myh8 (red) and immunofluorescence (IF) for  $\alpha$ -smooth muscle actin (green) in different vascular from mice. The profiles of colocalization were also provided. Scale bar, 25  $\mu$ m. \*  $p < 0.05$ .

**Figure S3. siRNA-specific silencing circ-myh8 contain head-to-tail junctions.**

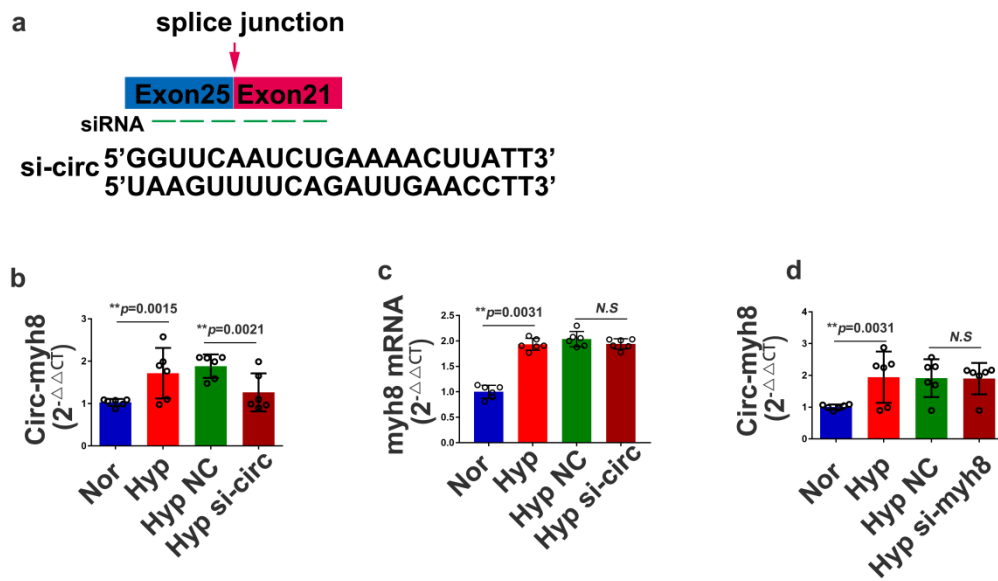

(a) Schematic illustration of two siRNAs targeting the back-splice junction of circ-myh8 (si-circ1 and nd si-circ2). circ-myh8 primer is a base sequence containing head-to-tail junctions and upstream and downstream. (b) RT-qPCR assay of interfering efficacy on circ-myh8 expression after transfection of the si-circ into PSMCs, and exposure to hypoxia for 24 h. (c) RT-qPCR assay of myh8 mRNA expression after transfection of the si-circ into PSMCs, and exposure to hypoxia for 24 h. (d) RT-qPCR assay of circ-myh8 expression after transfection of the si-myh8 into PSMCs, and exposure to hypoxia for 24 h. Nor represents normoxia, Hyp represents hypoxia, veh represents vehicle, and NC represent negative control. \*\*p < 0.01.

**Figure S4. Relation of Circ-myh8 with apoptosis, inflammation factor and PDGFR.**

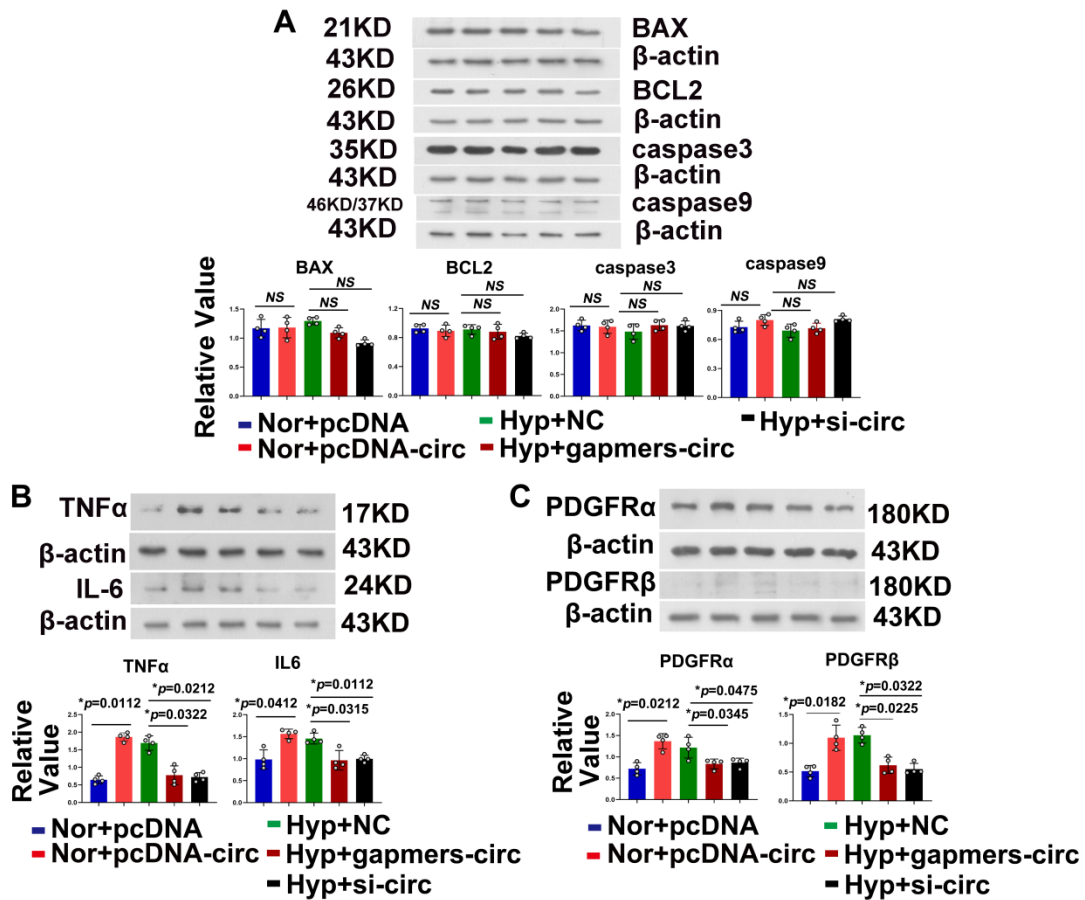

PASMCs were transfected with circ-myh8 plasmid or pcDNA following cultured in normoxia condition for 24h. For the circ-myh8 knockdown, PASMCs were transfected with circ-myh8 siRNA, gampers, or NC then exposure to hypoxia (0.3% FiO<sub>2</sub>) for 24h. Represent images and summarized data of Bax, BCL2, caspase 3 and caspase 9 (A), TNFα and IL-6 (B), PDGFRα and PDGFRβ (C). Nor represents normoxia, Hyp represents hypoxia, veh represents vehicle, and NC represent negative control, PDGFR represents platelet-derived growth factor receptor, TNF α represents tumor necrosis factor alpha, and IL6 represents interleukin-6.

**Figure S5. Circ-myh8 cannot bind to KAT5, KAT7 and KAT8. RNA pull-down assay followed by western blot for candidate proteins KAT1 (a), KAT5 (b) and KAT8 (c). KAT represents lysine acetyltransferase.**

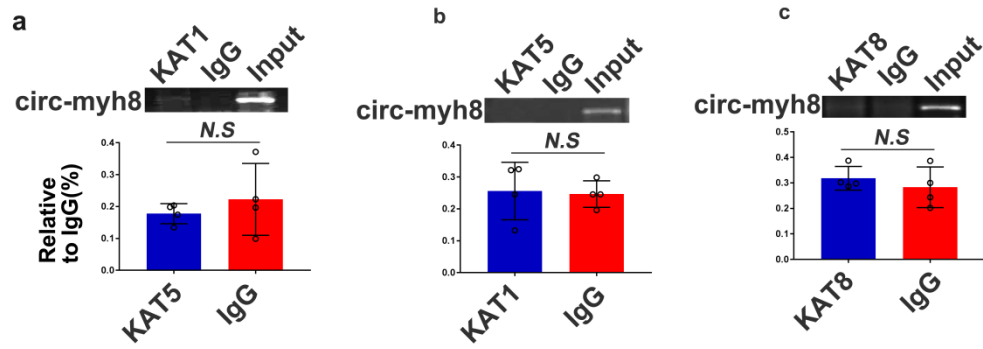

**Figure S6. No acetylation occurred at H4K12 and H3K14 sites in HIF1 $\alpha$  promoter region.**

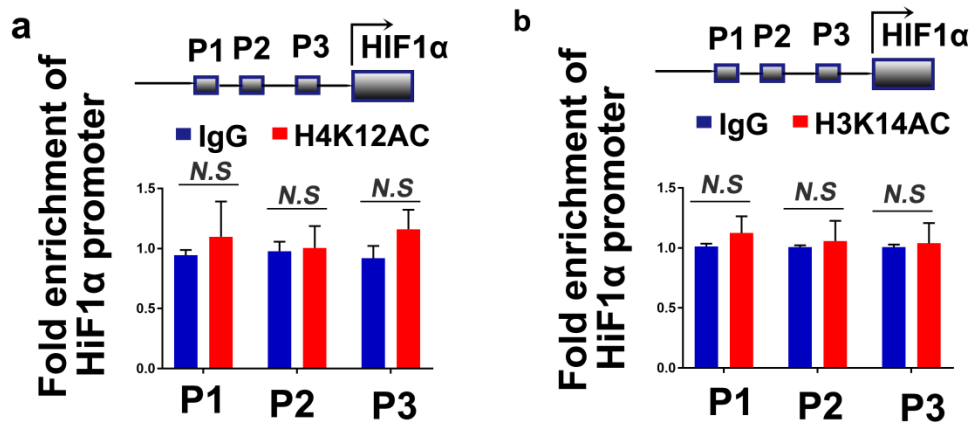

(a) ChIP assay for H4K12ac level and H3K14ac level (b) in HIF1 $\alpha$  promoter regions. Final DNA extractions were PCR amplified using primers that cover P1 (-5837bp to -5675bp), P2 (-803bp to -554bp) and P3 (-403bp to -172bp) sites in HIF1 $\alpha$  promoter. HIF1 $\alpha$  represents hypoxia inducible factor alpha, H4K12AC represents acetylation of lysine 12 of histone H4, H3K14AC represents acetylation of lysine 14 of histone H3.

**Table S1. Clinical information of the PH patients.**

| <b>Patient</b> | <b>Diagnosis</b> | <b>Origin</b> | <b>Sex</b> | <b>Age</b> | <b>mPAP<br/>(mmHg)</b> | <b>(PAWP)<br/>(mmHg)</b> | <b>RAP<br/>(mmHg)</b> | <b>PVR<br/>(WU)</b> | <b>CO<br/>(L/min)</b> | <b>LVEF<br/>(%)</b> |
|----------------|------------------|---------------|------------|------------|------------------------|--------------------------|-----------------------|---------------------|-----------------------|---------------------|
| 1              | IPAH             | Surgery       | F          | 39         | 72                     | 7                        | 2                     | 29.54               | 2.2                   | 51%                 |
| 2              | PAH-CTD          | Surgery       | F          | 31         | 55                     | 11                       | 4                     | 20.00               | 2.2                   | 67%                 |
| 3              | IPAH             | Surgery       | F          | 52         | 60                     | 14                       | 11                    | 8.07                | 5.7                   | 65%                 |
| 4              | IPAH             | Surgery       | M          | 66         | 57                     | 7                        | 9                     | 14.70               | 3.4                   | 64%                 |
| 5              | IPAH             | Surgery       | F          | 71         | 38                     | 13                       | 19                    | 6.76                | 3.7                   | 74%                 |
| 6              | Group 2 PH       | Surgery       | F          | 50         | 41                     | 15                       | 13                    | 13.52               | 2.3                   | 61%                 |
| 7              | Group 2 PH       | Surgery       | F          | 45         | 43                     | 17                       | 19                    | 15.30               | 1.7                   | 67%                 |
| 8              | Group 2 PH       | Surgery       | F          | 43         | 73                     | 18                       | 4                     | 28.79               | 1.8                   | 53%                 |
| 9              | IPAH             | Surgery       | F          | 35         | 64                     | 10                       | 19                    | 28.42               | 1.9                   | 72%                 |
| 10             | IPAH             | Surgery       | F          | 26         | 35                     | 8                        | 5                     | 4.90                | 5.5                   | 61%                 |

CO: cardiac output; iPAH: idiopathic pulmonary arterial hypertension; F: female; LVEF: left ventricle ejection fraction; Group 2 PH: PH due to left heart disease; M: male; mmHg: millimetres of mercury; mPAP: mean pulmonary artery pressure; PAWP: pulmonary artery wedge pressure; PVR: pulmonary vascular resistance; RAP: right atrial pressure; WU: Wood units.



**Table S2. siRNA and gapmers sequence, FISH probe, Biotin-circ-myh8 probe.**

| <b>Name</b>                   | <b>sequence (5'-3')</b> |
|-------------------------------|-------------------------|
| NC                            | UUCUCCGAACGUGUCACGUTT   |
| NC                            | ACGUGACACGUUCGGAGAATT   |
| <b>Si-circ-nyh8</b>           | GGUUCAAUUCUGAAAACUUATT  |
| <b>Si-circ-myh8</b>           | UAAGUUUUCAGAUUGAACCTT   |
| <b>Si-myh8</b>                | CGACAAGGUUCUAUCAGAAUG   |
| <b>Si-myh8</b>                | UUCUGAUAGAACCUUGUCGAA   |
| <b>Gapmers-circ-myh8</b>      | AUUUAAGTTTTTCAGAUUGA    |
| <b>FISH probe</b>             | GTTTATTTAAGTTTTTCAGATTG |
| <b>Biotin-circ-myh8 probe</b> | GUACGAAGUGAGGGUGUGUA    |

**Table S3. Primer sequence.**

| Name                        | sequence (5'-3')                  |
|-----------------------------|-----------------------------------|
| mmu-circ-myh8(F1)           | TTTGGACACACCAAGGTTTTCT (630bp)    |
| mmu-circ-myh8(R1)           | GTGATCGATATCAATAGAGCCCAG (630bp)  |
| mmu-circ-myh8(F2)           | GCTGGAGGAGAAGATGGTCACT (115bp)    |
| mmu-circ-myh8(R2)           | GAAGTGAGGGTGTGTACTTCTCAGA (115bp) |
| mmu-myh8(F1)                | CACCTGGAGCGGATGAAGAAGAAC (327bp)  |
| mmu-myh8(R1)                | CTCAGCCTCCTCAGCCTGTCTC (327bp)    |
| mmu-myh8(F2)                | AGACGGAGAGGAGCAGGAAGATTG (100bp)  |
| mmu-myh8(F2)                | TTGGTGTTGATGAGGCTCGTGTTT (100bp)  |
| Mmu-HIF1 $\alpha$ (F)       | CCACCACAACCTGCCACCACTG (141bp)    |
| Mmu-HIF1 $\alpha$ (R)       | TGCCACTGTATGCTGATGCCTTAG (141bp)  |
| Mmu-HIF1 $\beta$ (F)        | CCGAGAATGGCTGTGGATGAGAAC (140bp)  |
| Mmu-HIF1 $\beta$ (R)        | GGATGGTGTTGGACAGTGTAGGC (140bp)   |
| Mmu-HIF2 $\alpha$ (F)       | GATATGGCAGCGGTGTGACAGTC (115bp)   |
| Mmu-HIF2 $\alpha$ (R)       | CCCTCATAGCGGCAACAGCAC (115bp)     |
| Mmu-HIF2 $\beta$ (F)        | TGGAGCCAGGAGCACAGGATG (121bp)     |
| Mmu-HIF2 $\beta$ (F)        | CCAACACGCCACAGTACATCTACC (121bp)  |
| HIF1 $\alpha$ -promoter1(F) | TGGCTTGATTTTTGTCAGTAA (162bp)     |
| HIF1 $\alpha$ -promoter1(R) | CAAACTTTGAGACTTGAAATG (162bp)     |
| HIF1 $\alpha$ -promoter2(F) | GCATCCATTTAAGATGATCTTTG (249bp)   |
| HIF1 $\alpha$ -promoter2(R) | GGCCAAAGTTTGACTACTGAG (249bp)     |
| HIF1 $\alpha$ -promoter3(F) | TCAACTGGAACTCGGGCGG (232bp)       |
| HIF1 $\alpha$ -promoter3(R) | CGAGCGACGGGTGCGGCTGAG (232bp)     |
